# Supplementary material
Source: Springer Nature journal article supplement (https://www.springermedizin.de/resource/supplementary/12889_2010_3006_MOESM1_ESM.pdf/9487844)
Supplement: MOESM1 [file 9487844]

Maternal  
educational level

Childhood  
health

Biological determinants

Lifestyle determinants
